# Supplementary material for: The Metabolic Changes and Immune Profiles in Patients With COVID-19
Source: Front Immunol. 2020 Aug 28;11:2075. doi: 10.3389/fimmu.2020.02075 (PMC7485144; doi:10.3389/fimmu.2020.02075)
Supplement: Supplementary file 1 [file Table_1.pdf]

**Supplementary Table S1 Clinical characteristics of patients with COVID-19 Mild**

|                                        | patients (n=32) | Severe patients (n=21) |
|----------------------------------------|-----------------|------------------------|
| <b>Age (Y)</b>                         | 42 (27-55)      | 57 (49-68)             |
| <b>Gender (M/F)</b>                    | 15/17           | 13/8                   |
| <b>Signs and symptoms at admission</b> |                 |                        |
| Fever                                  | 20/32 (63%)     | 12/21 (57%)            |
| Cough                                  | 16/32 (50%)     | 10/21 (48%)            |
| Sputum                                 | 2/32 (6%)       | 3/21 (14%)             |
| Shortness of breath                    | 2/32 (6%)       | 4/21 (19%)             |
| Diarrhea                               | No              | 1/21 (5%)              |
| <b>Comorbidities</b>                   |                 |                        |
| Cardiovascular and cerebrovascular     | 2/32 (6%)       | 6/21 (28%)             |
| Endocrine system diseases (Diabetes)   | No              | 3/21 (14%)             |
| Digestive system disease               | No              | No                     |
| Respiratory system diseases            | No              | 1/21 (5%)              |
| Malignant tumor                        | No              | 1/21 (5%)              |
| Nervous system diseases                | No              | 1/21 (5%)              |
| Chronic kidney disease                 | 1/32 (3%)       | 1/21 (5%)              |
| Chronic liver disease                  | No              | 1/21 (5%)              |
| COPD                                   | No              | No                     |
| <b>Treatment</b>                       |                 |                        |
| Antibiotic treatment                   | 5/32 (16%)      | 12/21 (57%)            |
| Antiviral treatment                    | 22/32 (69%)     | 21/21 (100%)           |
| hormone therapy                        | No              | 8/21 (38%)             |
| <b>Ventilation</b>                     |                 |                        |
| Non-invasive(face mask, etc)           | No              | 14/21 (67%)            |
| Mechanical ventilation                 | No              | 7/21 (33%)             |
| <b>Clinical outcome</b>                |                 |                        |
| Discharged                             | 32/32 (100%)    | 17/21 (81%)            |
| Died                                   | 0               | 4/21 (19%)             |
